# Supplementary material
Source: publisher figshare collection journal article supplement (https://tandf.figshare.com/articles/dataset/_/7314566)
Supplement: Supplementary file 1 [file 1]

## **Appendix 1. Landsat image list**

| <b>Satellite/Sensor</b> | <b>Row/Path</b> | <b>Year</b> | <b>Date</b> | <b>Satellite/Sensor</b> | <b>Row/Path</b> | <b>Year</b> | <b>Date</b> |
|-------------------------|-----------------|-------------|-------------|-------------------------|-----------------|-------------|-------------|
| Landsat 5 TM            | 25039           | 1997        | 25-Jan      | Landsat 5 TM            | 26039           | 2007        | 23-Jul      |
| Landsat 5 TM            | 25040           | 1997        | 25-Jan      | Landsat 5 TM            | 26039           | 2007        | 8-Aug       |
| Landsat 5 TM            | 26040           | 1997        | 21-Mar      | Landsat 5 TM            | 26039           | 2007        | 24-Aug      |
| Landsat 5 TM            | 25040           | 1997        | 4-Jul       | Landsat 5 TM            | 25039           | 2007        | 4-Oct       |
| Landsat 5 TM            | 25039           | 1997        | 5-Aug       | Landsat 5 TM            | 25040           | 2007        | 4-Oct       |
| Landsat 5 TM            | 26039           | 1997        | 29-Sep      | Landsat 5 TM            | 25039           | 2008        | 12-Mar      |
| Landsat 5 TM            | 26040           | 1997        | 15-Oct      | Landsat 5 TM            | 25040           | 2008        | 12-Mar      |
| Landsat 5 TM            | 26039           | 1997        | 16-Nov      | Landsat 5 TM            | 26039           | 2008        | 19-Mar      |
| Landsat 5 TM            | 26039           | 1997        | 18-Dec      | Landsat 5 TM            | 26040           | 2008        | 19-Mar      |
| Landsat 5 TM            | 26040           | 1997        | 18-Dec      | Landsat 5 TM            | 25039           | 2008        | 29-Apr      |
| Landsat 5 TM            | 25039           | 1997        | 27-Dec      | Landsat 5 TM            | 25040           | 2008        | 29-Apr      |
| Landsat 5 TM            | 25040           | 1997        | 27-Dec      | Landsat 5 TM            | 25039           | 2008        | 4-Sep       |
| Landsat 5 TM            | 26040           | 1998        | 19-Jan      | Landsat 5 TM            | 25040           | 2008        | 4-Sep       |
| Landsat 5 TM            | 26039           | 1998        | 20-Feb      | Landsat 5 TM            | 26039           | 2008        | 27-Sep      |
| Landsat 5 TM            | 26040           | 1998        | 20-Feb      | Landsat 5 TM            | 26040           | 2008        | 27-Sep      |
| Landsat 5 TM            | 25039           | 1998        | 1-Mar       | Landsat 5 TM            | 26039           | 2008        | 29-Oct      |
| Landsat 5 TM            | 25040           | 1998        | 1-Mar       | Landsat 5 TM            | 26040           | 2008        | 30-Nov      |
| Landsat 5 TM            | 25040           | 1998        | 17-Mar      | Landsat 5 TM            | 26039           | 2009        | 2-Feb       |
| Landsat 5 TM            | 26039           | 1998        | 9-Apr       | Landsat 5 TM            | 25039           | 2009        | 11-Feb      |
| Landsat 5 TM            | 26040           | 1998        | 9-Apr       | Landsat 5 TM            | 26039           | 2009        | 7-Apr       |
| Landsat 5 TM            | 25039           | 1998        | 7-Jul       | Landsat 5 TM            | 26040           | 2009        | 7-Apr       |
| Landsat 5 TM            | 26039           | 1998        | 3-Nov       | Landsat 5 TM            | 25039           | 2009        | 18-May      |
| Landsat 5 TM            | 25040           | 1998        | 14-Dec      | Landsat 5 TM            | 25040           | 2009        | 18-May      |
| Landsat 5 TM            | 25039           | 1998        | 30-Dec      | Landsat 5 TM            | 25039           | 2009        | 22-Aug      |
| Landsat 5 TM            | 25040           | 1999        | 31-Jan      | Landsat 5 TM            | 25040           | 2009        | 22-Aug      |
| Landsat 5 TM            | 26039           | 1999        | 28-Apr      | Landsat 5 TM            | 26040           | 2009        | 1-Nov       |
| Landsat 5 TM            | 25039           | 1999        | 7-May       | Landsat 5 TM            | 25040           | 2009        | 10-Nov      |
| Landsat 5 TM            | 25040           | 1999        | 7-May       | Landsat 5 TM            | 26039           | 2009        | 3-Dec       |
| Landsat 5 TM            | 25039           | 1999        | 27-Aug      | Landsat 5 TM            | 26040           | 2009        | 3-Dec       |
| Landsat 5 TM            | 26039           | 1999        | 19-Sep      | Landsat 5 TM            | 25039           | 2010        | 18-Mar      |
| Landsat 5 TM            | 26040           | 1999        | 19-Sep      | Landsat 5 TM            | 25040           | 2010        | 18-Mar      |
| Landsat 5 TM            | 26040           | 1999        | 21-Oct      | Landsat 5 TM            | 26039           | 2010        | 25-Mar      |
| Landsat 5 TM            | 25040           | 1999        | 15-Nov      | Landsat 5 TM            | 26040           | 2010        | 25-Mar      |
| Landsat 7 ETM+          | 26040           | 1999        | 30-Nov      | Landsat 5 TM            | 25039           | 2010        | 5-May       |
| Landsat 5 TM            | 25039           | 1999        | 1-Dec       | Landsat 5 TM            | 25040           | 2010        | 5-May       |
| Landsat 5 TM            | 26039           | 1999        | 24-Dec      | Landsat 5 TM            | 26039           | 2010        | 31-Jul      |
| Landsat 7 ETM+          | 26039           | 2000        | 17-Jan      | Landsat 5 TM            | 25039           | 2010        | 25-Aug      |

|                |       |      |        |                |       |      |        |
|----------------|-------|------|--------|----------------|-------|------|--------|
| Landsat 5 TM   | 25039 | 2000 | 3-Feb  | Landsat 5 TM   | 25040 | 2010 | 25-Aug |
| Landsat 5 TM   | 25040 | 2000 | 3-Feb  | Landsat 5 TM   | 26040 | 2010 | 3-Oct  |
| Landsat 7 ETM+ | 26039 | 2000 | 12-Aug | Landsat 5 TM   | 26039 | 2010 | 4-Nov  |
| Landsat 7 ETM+ | 26040 | 2000 | 12-Aug | Landsat 5 TM   | 26040 | 2010 | 6-Dec  |
| Landsat 5 TM   | 25040 | 2000 | 13-Aug | Landsat 5 TM   | 26039 | 2011 | 8-Feb  |
| Landsat 7 ETM+ | 26039 | 2000 | 29-Sep | Landsat 5 TM   | 26040 | 2011 | 8-Feb  |
| Landsat 7 ETM+ | 26040 | 2000 | 29-Sep | Landsat 5 TM   | 26040 | 2011 | 29-Apr |
| Landsat 5 TM   | 25039 | 2000 | 30-Sep | Landsat 5 TM   | 26039 | 2011 | 15-May |
| Landsat 5 TM   | 25040 | 2000 | 30-Sep | Landsat 5 TM   | 26039 | 2011 | 3-Aug  |
| Landsat 7 ETM+ | 26040 | 2000 | 16-Dec | Landsat 5 TM   | 26040 | 2011 | 3-Aug  |
| Landsat 5 TM   | 25039 | 2000 | 19-Dec | Landsat 5 TM   | 25039 | 2011 | 28-Aug |
| Landsat 5 TM   | 25039 | 2001 | 4-Jan  | Landsat 5 TM   | 25040 | 2011 | 28-Aug |
| Landsat 5 TM   | 25040 | 2001 | 20-Jan | Landsat 5 TM   | 25039 | 2011 | 13-Sep |
| Landsat 7 ETM+ | 26039 | 2001 | 4-Feb  | Landsat 5 TM   | 25040 | 2011 | 13-Sep |
| Landsat 7 ETM+ | 26040 | 2001 | 4-Feb  | Landsat 5 TM   | 25039 | 2011 | 31-Oct |
| Landsat 5 TM   | 25040 | 2001 | 5-Feb  | Landsat 5 TM   | 25040 | 2011 | 31-Oct |
| Landsat 5 TM   | 25039 | 2001 | 26-Apr | Landsat 7 ETM+ | 26040 | 2012 | 2-Jan  |
| Landsat 5 TM   | 26039 | 2001 | 22-Jul | Landsat 7 ETM+ | 25039 | 2012 | 11-Jan |
| Landsat 5 TM   | 26040 | 2001 | 22-Jul | Landsat 7 ETM+ | 25040 | 2012 | 11-Jan |
| Landsat 5 TM   | 26039 | 2001 | 26-Oct | Landsat 7 ETM+ | 26039 | 2012 | 18-Jan |
| Landsat 5 TM   | 26040 | 2001 | 26-Oct | Landsat 7 ETM+ | 25039 | 2012 | 27-Jan |
| Landsat 5 TM   | 25039 | 2001 | 4-Nov  | Landsat 7 ETM+ | 25040 | 2012 | 27-Jan |
| Landsat 5 TM   | 25040 | 2001 | 4-Nov  | Landsat 7 ETM+ | 26039 | 2012 | 22-Mar |
| Landsat 5 TM   | 26039 | 2002 | 14-Jan | Landsat 7 ETM+ | 26040 | 2012 | 22-Mar |
| Landsat 5 TM   | 26040 | 2002 | 14-Jan | Landsat 7 ETM+ | 26040 | 2012 | 7-Apr  |
| Landsat 5 TM   | 25039 | 2002 | 24-Feb | Landsat 7 ETM+ | 26039 | 2012 | 23-Apr |
| Landsat 5 TM   | 25040 | 2002 | 24-Feb | Landsat 7 ETM+ | 25039 | 2012 | 18-May |
| Landsat 5 TM   | 25039 | 2002 | 3-Aug  | Landsat 7 ETM+ | 25040 | 2012 | 18-May |
| Landsat 5 TM   | 25040 | 2002 | 3-Aug  | Landsat 7 ETM+ | 26039 | 2012 | 29-Aug |
| Landsat 5 TM   | 26039 | 2002 | 27-Sep | Landsat 7 ETM+ | 26040 | 2012 | 29-Aug |
| Landsat 5 TM   | 26040 | 2002 | 27-Sep | Landsat 7 ETM+ | 25039 | 2012 | 23-Sep |
| Landsat 5 TM   | 26039 | 2002 | 29-Oct | Landsat 7 ETM+ | 25040 | 2012 | 23-Sep |
| Landsat 5 TM   | 26040 | 2002 | 29-Oct | Landsat 7 ETM+ | 26039 | 2012 | 17-Nov |
| Landsat 5 TM   | 25039 | 2002 | 7-Nov  | Landsat 7 ETM+ | 26040 | 2012 | 17-Nov |
| Landsat 5 TM   | 25040 | 2002 | 23-Nov | Landsat 7 ETM+ | 25039 | 2012 | 12-Dec |
| Landsat 5 TM   | 26040 | 2003 | 1-Jan  | Landsat 7 ETM+ | 25040 | 2012 | 12-Dec |
| Landsat 5 TM   | 26039 | 2003 | 17-Jan | Landsat 8 OLI  | 26039 | 2013 | 27-Mar |
| Landsat 5 TM   | 25039 | 2003 | 31-Mar | Landsat 8 OLI  | 26040 | 2013 | 27-Mar |
| Landsat 5 TM   | 25040 | 2003 | 31-Mar | Landsat 8 OLI  | 25040 | 2013 | 11-Apr |
| Landsat 5 TM   | 25039 | 2003 | 18-May | Landsat 8 OLI  | 26040 | 2013 | 4-May  |

|                |       |      |        |               |       |      |        |
|----------------|-------|------|--------|---------------|-------|------|--------|
| Landsat 5 TM   | 25040 | 2003 | 18-May | Landsat 8 OLI | 25039 | 2013 | 13-May |
| Landsat 5 TM   | 25040 | 2003 | 7-Sep  | Landsat 8 OLI | 26039 | 2013 | 8-Aug  |
| Landsat 5 TM   | 26039 | 2003 | 30-Sep | Landsat 8 OLI | 25039 | 2013 | 17-Aug |
| Landsat 5 TM   | 26040 | 2003 | 30-Sep | Landsat 8 OLI | 25040 | 2013 | 17-Aug |
| Landsat 5 TM   | 25039 | 2003 | 10-Nov | Landsat 8 OLI | 26039 | 2013 | 25-Sep |
| Landsat 5 TM   | 26039 | 2003 | 19-Dec | Landsat 8 OLI | 26040 | 2013 | 25-Sep |
| Landsat 5 TM   | 26040 | 2003 | 19-Dec | Landsat 8 OLI | 25039 | 2013 | 23-Dec |
| Landsat 5 TM   | 26039 | 2004 | 21-Feb | Landsat 8 OLI | 25040 | 2013 | 23-Dec |
| Landsat 5 TM   | 26040 | 2004 | 8-Mar  | Landsat 8 OLI | 26039 | 2014 | 15-Jan |
| Landsat 5 TM   | 26040 | 2004 | 9-Apr  | Landsat 8 OLI | 26040 | 2014 | 15-Jan |
| Landsat 5 TM   | 25039 | 2004 | 4-May  | Landsat 8 OLI | 25039 | 2014 | 13-Mar |
| Landsat 5 TM   | 25040 | 2004 | 4-May  | Landsat 8 OLI | 25040 | 2014 | 13-Mar |
| Landsat 5 TM   | 26039 | 2004 | 14-Jul | Landsat 8 OLI | 26039 | 2014 | 20-Mar |
| Landsat 5 TM   | 26040 | 2004 | 14-Jul | Landsat 8 OLI | 26040 | 2014 | 20-Mar |
| Landsat 5 TM   | 26039 | 2004 | 15-Aug | Landsat 8 OLI | 25039 | 2014 | 16-May |
| Landsat 5 TM   | 25039 | 2004 | 9-Sep  | Landsat 8 OLI | 25040 | 2014 | 16-May |
| Landsat 5 TM   | 25040 | 2004 | 9-Sep  | Landsat 8 OLI | 26039 | 2014 | 14-Oct |
| Landsat 5 TM   | 25039 | 2004 | 14-Dec | Landsat 8 OLI | 26040 | 2014 | 14-Oct |
| Landsat 5 TM   | 25040 | 2004 | 14-Dec | Landsat 8 OLI | 25039 | 2014 | 24-Nov |
| Landsat 5 TM   | 26039 | 2005 | 11-Mar | Landsat 8 OLI | 25040 | 2014 | 24-Nov |
| Landsat 7 ETM+ | 25040 | 2005 | 12-Mar | Landsat 8 OLI | 25039 | 2015 | 27-Jan |
| Landsat 5 TM   | 26040 | 2005 | 12-Apr | Landsat 8 OLI | 25040 | 2015 | 27-Jan |
| Landsat 5 TM   | 25039 | 2005 | 23-May | Landsat 8 OLI | 25040 | 2015 | 12-Feb |
| Landsat 5 TM   | 25040 | 2005 | 24-Jun | Landsat 8 OLI | 26039 | 2015 | 23-Mar |
| Landsat 5 TM   | 25039 | 2005 | 10-Jul | Landsat 8 OLI | 26040 | 2015 | 23-Mar |
| Landsat 5 TM   | 25040 | 2005 | 26-Jul | Landsat 8 OLI | 26039 | 2015 | 1-Oct  |
| Landsat 5 TM   | 26039 | 2005 | 21-Oct | Landsat 8 OLI | 26040 | 2015 | 1-Oct  |
| Landsat 5 TM   | 26040 | 2005 | 21-Oct | Landsat 8 OLI | 25039 | 2015 | 10-Oct |
| Landsat 5 TM   | 26039 | 2005 | 22-Nov | Landsat 8 OLI | 25040 | 2015 | 10-Oct |
| Landsat 5 TM   | 26040 | 2005 | 22-Nov | Landsat 8 OLI | 26039 | 2015 | 4-Dec  |
| Landsat 7 ETM+ | 25040 | 2005 | 23-Nov | Landsat 8 OLI | 26040 | 2015 | 4-Dec  |
| Landsat 5 TM   | 25039 | 2005 | 31-Dec | Landsat 8 OLI | 26039 | 2016 | 6-Feb  |
| Landsat 5 TM   | 25040 | 2005 | 31-Dec | Landsat 8 OLI | 26040 | 2016 | 6-Feb  |
| Landsat 5 TM   | 25039 | 2006 | 18-Jan | Landsat 8 OLI | 25039 | 2016 | 2-Mar  |
| Landsat 5 TM   | 25040 | 2006 | 18-Jan | Landsat 8 OLI | 26039 | 2016 | 25-Mar |
| Landsat 5 TM   | 26039 | 2006 | 26-Feb | Landsat 8 OLI | 25040 | 2016 | 3-Apr  |
| Landsat 5 TM   | 26040 | 2006 | 14-Mar | Landsat 8 OLI | 25039 | 2016 | 5-May  |
| Landsat 5 TM   | 25040 | 2006 | 8-Apr  | Landsat 8 OLI | 25040 | 2016 | 5-May  |
| Landsat 5 TM   | 26039 | 2006 | 17-May | Landsat 8 OLI | 25040 | 2016 | 28-Oct |
| Landsat 5 TM   | 26040 | 2006 | 17-May | Landsat 8 OLI | 26039 | 2016 | 20-Nov |

|              |       |      |        |               |       |      |        |
|--------------|-------|------|--------|---------------|-------|------|--------|
| Landsat 5 TM | 25039 | 2006 | 27-Jun | Landsat 8 OLI | 26040 | 2016 | 20-Nov |
| Landsat 5 TM | 25039 | 2006 | 4-Dec  | Landsat 8 OLI | 26040 | 2016 | 6-Dec  |
| Landsat 5 TM | 25040 | 2006 | 4-Dec  | Landsat 8 OLI | 25039 | 2016 | 15-Dec |
| Landsat 5 TM | 26039 | 2006 | 27-Dec | Landsat 8 OLI | 26039 | 2017 | 7-Jan  |
| Landsat 5 TM | 26040 | 2006 | 27-Dec | Landsat 8 OLI | 26040 | 2017 | 7-Jan  |
| Landsat 5 TM | 26039 | 2007 | 28-Jan | Landsat 8 OLI | 26039 | 2017 | 23-Jan |
| Landsat 5 TM | 26040 | 2007 | 28-Jan | Landsat 8 OLI | 26040 | 2017 | 23-Jan |
| Landsat 5 TM | 26040 | 2007 | 13-Feb | Landsat 8 OLI | 25039 | 2017 | 21-Mar |
| Landsat 5 TM | 26039 | 2007 | 1-Mar  | Landsat 8 OLI | 25040 | 2017 | 21-Mar |
| Landsat 5 TM | 25039 | 2007 | 11-Apr | Landsat 8 OLI | 26040 | 2017 | 28-Mar |
| Landsat 5 TM | 25040 | 2007 | 11-Apr | Landsat 8 OLI | 25039 | 2017 | 6-Apr  |
| Landsat 5 TM | 26040 | 2007 | 18-Apr | Landsat 8 OLI | 25040 | 2017 | 6-Apr  |
| Landsat 5 TM | 25039 | 2007 | 13-May | Landsat 8 OLI | 26039 | 2017 | 15-May |
| Landsat 5 TM | 25040 | 2007 | 13-May |               |       |      |        |

## **Appendix 2. Validation imagery list**

| Sensor                   | Date      |
|--------------------------|-----------|
| AndrewLonnieSikes aerial | 17-Dec-98 |
| AndrewLonnieSikes aerial | 17-Dec-98 |
| AndrewLonnieSikes aerial | 17-Dec-98 |
| AndrewLonnieSikes aerial | 18-Jan-99 |
| AndrewLonnieSikes aerial | 18-Jan-99 |
| AndrewLonnieSikes aerial | 18-Jan-99 |
| IKONOS                   | 2-Jan-03  |
| IKONOS                   | 11-Nov-03 |
| IKONOS                   | 17-Aug-04 |
| Quickbird                | 24-Apr-05 |
| Quickbird                | 25-May-05 |
| HGAC aerial              | 5-Aug-06  |
| Quickbird                | 7-Jan-07  |
| Quickbird                | 7-Jan-07  |
| Quickbird                | 29-Jul-09 |
| Quickbird                | 17-Jan-10 |
| Worldview                | 23-Jul-10 |
| Quickbird                | 24-Jul-10 |
| Worldview                | 27-Jan-12 |
| Worldview                | 27-Jan-12 |
| Quickbird                | 30-Jul-12 |
| Worldview                | 6-Jan-13  |
| Quickbird                | 3-Jul-13  |
| Worldview                | 15-Jan-14 |
| Worldview                | 8-Jan-15  |
| Worldview                | 16-Jan-15 |
| Worldview                | 19-Jan-15 |
| Worldview                | 28-Jan-16 |
| Worldview                | 15-Jul-16 |
| Worldview                | 22-Jan-17 |

### **Appendix 3. Land cover class definitions**

| <b>Class code</b> | <b>Class name</b>            | <b>NLCD code</b>   | <b>NLCD class description*</b>                                                                                                                                                                                                                                                                                                                                                           |
|-------------------|------------------------------|--------------------|------------------------------------------------------------------------------------------------------------------------------------------------------------------------------------------------------------------------------------------------------------------------------------------------------------------------------------------------------------------------------------------|
| 1                 | Barren / Sand                | 31                 | Anthropogenically impacted areas of unconsolidated dirt and rock (e.g. dirt lots, strip mines, gravel pits and other accumulations of earthen material)                                                                                                                                                                                                                                  |
| 2                 | Developed - Open             | 21                 | Developed areas with a mixture of some constructed materials, but mostly vegetation in the form of lawn grasses. Impervious surfaces account for less than 20 percent of total cover. These areas most commonly include large-lot single-family housing units, parks, golf courses, and vegetation planted in developed settings for recreation, erosion control, or aesthetic purposes. |
| 4                 | Developed – Low intensity    | 22                 | Developed areas with a mixture of constructed materials and vegetation. Impervious surfaces account for 20-49 percent of total cover. These areas most commonly include single-family housing units.                                                                                                                                                                                     |
| 8                 | Developed – Medium intensity | 23                 | Developed areas with a mixture of constructed materials and vegetation. Impervious surfaces account for 50-79 percent of the total cover. These areas most commonly include single-family housing units                                                                                                                                                                                  |
| 13                | Developed – High intensity   | 24                 | Highly developed areas where people reside or work in high numbers. Examples include apartment complexes, row houses and commercial/industrial. Impervious surfaces account for 80 to 100 percent of the total cover.                                                                                                                                                                    |
| 21                | Cultivated Crops             | 82                 | Cultivated Crops - Areas used for the production of annual crops, such as corn, soybeans, vegetables, tobacco, and cotton, and also perennial woody crops such as orchards and vineyards. Crop vegetation accounts for greater than 20 percent of total vegetation. This class also includes all land being actively tilled.                                                             |
| 35                | Grassland / Pasture          | 71, 81, 95         | Upland and wetland areas dominated by grammanoid or herbaceous vegetation which may be subject to intensive management such as tilling, grazing, or the production of seed or hay crops.                                                                                                                                                                                                 |
| 50                | Forest                       | 41, 42, 43, 52, 90 | Upland and wetland areas where forest (>5m) and shrubland (<5m) vegetation accounts for greater than 20 percent of vegetative cover.                                                                                                                                                                                                                                                     |
| 71                | Water                        | 11                 | All areas of open water                                                                                                                                                                                                                                                                                                                                                                  |

\* Derived NLCD class definitions from Homer, C.G., Dewitz, J.A., Yang, L., Jin, S., Danielson, P., Xian, G., Coulston, J., Herold, N.D., Wickham, J.D., Megown, K., 2015. Completion of the 2011 National Land Cover Database for the conterminous United States-Representing a decade of land cover change information. Photogramm. Eng. Remote Sensing 81, 345–354.

**Appendix 4. Developed classes agreement with NLCD maps for 2001, 2006, and 2011.**

Table 1. Combined Developed classes only, where NLCD is the reference map.  $U_{AG}$  - user's agreement;  $P_{AG}$  - producer's agreement.

|      | $U_{AG}$ | $P_{AG}$ | <b>F-score</b> |
|------|----------|----------|----------------|
| 2001 | 86.6%    | 92.4%    | 89.4%          |
| 2006 | 81.6%    | 97.2%    | 88.7%          |
| 2011 | 81.3%    | 97.2%    | 88.5%          |

## **Appendix 5. Distribution of validation sample set in space and time.**

**Table 1. Class cover as total proportion of area (%).** Values represent the areal proportions for each class in all validation imagery (sample) and the entire study area (population).

| <b>Class</b>            | <b>Validation imagery</b> | <b>Full HGAC</b> |
|-------------------------|---------------------------|------------------|
| <b>Sand / Barren</b>    | 0.3%                      | 0.3%             |
| <b>Dev-Open</b>         | 11.0%                     | 8.2%             |
| <b>Dev-Low</b>          | 6.1%                      | 2.8%             |
| <b>Dev-Med</b>          | 6.2%                      | 2.3%             |
| <b>Dev-High</b>         | 5.3%                      | 1.8%             |
| <b>Cultivated Crops</b> | 7.2%                      | 12.0%            |
| <b>Grass</b>            | 32.3%                     | 35.5%            |
| <b>Forest</b>           | 27.0%                     | 26.5%            |
| <b>Water</b>            | 4.5%                      | 10.7%            |

**Table 2. Total samples (pixels) by Year.**

| <b>Year</b> | <b>Total samples</b> |
|-------------|----------------------|
| 1999        | 259                  |
| 2003        | 213                  |
| 2004        | 117                  |
| 2005        | 306                  |
| 2006        | 100                  |
| 2007        | 228                  |
| 2009        | 104                  |
| 2010        | 280                  |
| 2012        | 298                  |
| 2013        | 240                  |
| 2014        | 154                  |
| 2015        | 387                  |
| 2016        | 272                  |
| 2017        | 132                  |



## Appendix 6. Raw confusion matrices (samples)

**Table 1. Raw sample confusion matrix (full).** UA – user’s accuracy; UE – User’s error (commission); PA - producer’s accuracy; PE - producer’s error (omission); OA – overall accuracy; OE – overall error.

|     |                  | Reference   |          |         |         |          |                  |                     |        |       |       |       |
|-----|------------------|-------------|----------|---------|---------|----------|------------------|---------------------|--------|-------|-------|-------|
|     |                  | Sand/Barren | Dev-Open | Dev-Low | Dev-Med | Dev-High | Cultivated Crops | Grassland / Pasture | Forest | Water | UA    | UE    |
| Map | Sand / Barren    | 73          | 0        | 1       | 0       | 2        | 0                | 0                   | 0      | 0     | 96.1% | 4.4%  |
|     | Dev-Open         | 1           | 125      | 102     | 25      | 10       | 2                | 19                  | 10     | 2     | 42.2% | 5.6%  |
|     | Dev-Low          | 0           | 25       | 165     | 85      | 20       | 0                | 6                   | 0      | 0     | 54.8% | 5.6%  |
|     | Dev-Med          | 1           | 13       | 71      | 208     | 71       | 0                | 5                   | 0      | 1     | 56.2% | 5.1%  |
|     | Dev-High         | 2           | 4        | 18      | 52      | 247      | 0                | 0                   | 0      | 0     | 76.5% | 4.6%  |
|     | Cultivated Crops | 0           | 2        | 1       | 0       | 0        | 110              | 41                  | 4      | 1     | 69.2% | 7.2%  |
|     | Grass            | 2           | 37       | 10      | 2       | 1        | 28               | 646                 | 24     | 4     | 85.7% | 2.5%  |
|     | Forest           | 0           | 26       | 8       | 1       | 0        | 1                | 38                  | 462    | 5     | 85.4% | 3.0%  |
|     | Water            | 3           | 1        | 2       | 0       | 1        | 0                | 10                  | 3      | 196   | 90.7% | 3.9%  |
|     | PA               | 46%         | 50%      | 36%     | 40%     | 57%      | 86%              | 83%                 | 92%    | 95%   | OA    | 77.9% |
|     | PE               | 11%         | 33%      | 24%     | 22%     | 15%      | 13%              | 4%                  | 3%     | 2%    | OE    | 1.6%  |

**Table 2. Raw sample confusion matrix (reduced).** UA – user’s accuracy; UE – User’s error (commission); PA - producer’s accuracy; PE - producer’s error (omission); OA – overall accuracy; OE – overall error.

|            |           | <b>Reference</b> |       |       |       |        |       |           |              |
|------------|-----------|------------------|-------|-------|-------|--------|-------|-----------|--------------|
|            |           | Barren           | Dev   | Ag    | Grass | Forest | Water | <b>UA</b> | <b>UE</b>    |
| <b>Map</b> | Barren    | 73               | 3     | 0     | 0     | 0      | 0     | 96.1%     | 4.4%         |
|            | Dev       | 4                | 1241  | 2     | 30    | 10     | 3     | 96.2%     | 1.0%         |
|            | Ag        | 0                | 3     | 110   | 41    | 4      | 1     | 69.2%     | 7.2%         |
|            | Grass     | 2                | 50    | 28    | 646   | 24     | 4     | 85.7%     | 2.5%         |
|            | Forest    | 0                | 35    | 1     | 38    | 462    | 5     | 85.4%     | 3.0%         |
|            | Water     | 3                | 4     | 0     | 10    | 3      | 196   | 90.7%     | 3.9%         |
|            | <b>PA</b> | 45.2%            | 80.8% | 85.8% | 83.9% | 92.4%  | 94.9% | <b>OA</b> | <b>86.2%</b> |
| <b>PE</b>  |           | 11.4%            | 1.7%  | 12.7% | 4.0%  | 2.4%   | 2.1%  | <b>OE</b> | <b>1.5%</b>  |
